# Supplementary material
Source: publisher site journal article supplement (https://www.jstage.jst.go.jp/article/chikusan/91/4/91_371/_supplement/_download/91_371_1.pdf)
Supplement: Supplementary file 1 [file 91_371_1.pdf]

# 補 説

ラテン方格法の実験データに関する統計分析について

On statistical analysis for experimental data using latin square designs

広岡博之<sup>1</sup>・守屋和幸<sup>2</sup>

1. 京都大学農学研究科, 京都市左京区 606-8502
2. 京都大学情報学研究科, 京都市左京区 606-8501

日本畜産学会報 91 巻 4 号

## 補 説

### (1) SAS プログラム

ここでは、母数モデルには GLM プロシジャーを、混合モデルには MIXED プロシジャーを用いて分析した。また、変数には乳量(my), 処理(treat), 期間(period), 個体(anim), 実験番号(exp)を用いた。なお平均値間の多重比較には Tukey 法を用いている。

#### ケース 1, ケース 3, ケース 4 (交互作用なし)

##### 母数モデル

```
proc glm ;
  class treat period anim ;
  model my= treat period anim ;
  lsmeans treat/pdiff stderr adjust=tukey ;
```

##### 混合モデル

```
proc mixed ;
  class treat period anim;
  model my=treat period/ddfm=satterth;
  random anim ;
  lsmeans treat/diff adjust=tukey ;
```

#### ケース 2

##### 母数モデル

```
proc glm ;
  class exp treat period anim;
  model my=exp treat period(exp) anim(exp);
  lsmeans treat/pdiff stderr adjust=tukey ;
```

##### 混合モデル

```
proc mixed ;
  class treat period anim exp;
  model my=treat period(exp) exp;
  random anim(exp) ;
  lsmeans treat/pdiff adjust=tukey ;
```

なお、吉田(1983)と同じ結果を得るためには、以下のように test ステートメントを入れればよい。

```
proc glm ;
  class exp treat period anim;
  model my=exp treat period(exp) anim(exp);
  test h=treat e=treat*exp ;
  lsmeans treat/pdiff stderr adjust=tukey ;
```

#### ケース 4 (交互作用あり)

##### 母数モデル

```
proc glm ;
  class treat period anim ;
  model my= treat period anim treat*period ;
  lsmeans treat/pdiff stderr adjust=tukey ;
```

##### 混合モデル

```
proc mixed ;
  class treat period anim;
  model my=treat period treat*meriod/ddfm=satterth;
  random anim ;
  lsmeans treat/diff adjust=tukey ;
```

## (2) R プログラム

母数モデルであれば `aov()` を用い、混合モデル(母数効果と変量効果を含むモデル)であれば `lmer()` を用いる。また、混合モデルのもとでの母数効果の多重検定には `glht()` を用いる。さらに母数効果の最小 2 乗平均値の計算には `lsmeans()` を用いる。`lmer()`、`glht()` および `lsmeans()` は R の標準システムではあらかじめ用意されていないので、別途これらの関数を含むパッケージをインストールする必要がある。パッケージのインストールは `install.packages("パッケージ名")` で簡単に行える。`lmer()` に対しては `lme4`、`glht()` に対しては `multcomp`、`lsmeans()` に対しては `lsmeans` をパッケージ名として与える。パッケージのインストールは一度行うだけで良い。

メソッド `aov()` および `lmer()` では、各要因の制限がデフォルトでは `reference level` (各要因の第 1 水準) を 0 としているが、SAS と同じ最小 2 乗平均値を得るためには `zero-sum` (要因内の水準の最小 2 乗恒数の総和が 0) の指定を `options()` で明示的に指定しておかなければならない。そのためには、以下のコードを最初に実行しておく。

```
> old.option <- options() #Default Option の退避
> options(contrasts=c("contr.sum", "contr.poly")) #zero-sum の設定
```

分散分析の実行、母数効果(飼料)の最小 2 乗平均値の計算および多重検定はどのケースでも同じ手順で行える。混合モデルの分散分析には `lme4` package の `lmer()` を用いる。母数効果の最小 2 乗平均値は `lsmeans` package の `lsmeans()` を用いる。また、混合モデルの下での母数効果の多重検定には `multcomp` package の `glht()` を用いる。そのため、最初にこれらの package の使用を宣言しておく。

```
library(lme4)
library(lsmeans)
library(multcomp)
```

また、各要因に関する制約条件(デフォルトで各要因の第 1 水準を 0 とする)を `zero-sum` (すなわち、各要因の水準の最小 2 乗恒数の和が 0) に設定するためには以下のコードを実行する。

分析の流れは以下ようになる。

### 1. 母数モデルの場合

```
fCase1 <- lm(数学モデルの式, data=分析用データフレーム名)
anova(fCase1) #分散分析表の表示
#Tukey HSD test のために aov を実行
fmodHSD <- aov(数学モデルの式, data=分析用データフレーム名)
TukeyHSD(fmodHSD)$treat
# 飼料の最小 2 乗平均値
full.ref <- ref.grid(fCase1)
lsmeans(full.ref, "treat") #最小 2 乗平均値の出力
```

※`TukeyHSD` では `aov()` の結果オブジェクトが必要であり、一方、`lsmeans()` では `lm()` の結果オブジェクトが必要なため、上述したように、同じ数学モデルを用いて `lm()` と `aov()` を実行する必要がある。

### 2. 混合モデルの場合

```
rCase1 <- lmer(数学モデルの式, data=分析用データフレーム名)
summary(rCase1) #結果の表示
anova(rCase1) #分散分析表(母数効果のみ)表示
# 飼料の最小 2 乗平均値の多重検定と結果の表示
summary(glht(rCase1, linfct=mcp(treat="Tukey")))
# 飼料の最小 2 乗平均値
full.ref <- ref.grid(rCase1)
lsmeans(full.ref, "treat") #最小 2 乗平均値の出力
```

※`lm()`、`aov()`、`lmer()` および `ref.grid()` の左辺の結果オブジェクト名は任意の名前で良い。数学モデルの式は、応答変数名~(チルダ)要因 1+要因 2+・・・のように記述する。

巣ごもり効果は `exp:period` のように、ネストされる主効果名：ネストする要因で表わす。交互作用は要因 1\*要因 2 のように表わす。変量効果は `(1|anim)` のように表わす。それぞれのケースの数学モデルの式は以下のように表わすことができる。

ケース 1

母数モデル : `my ~ treat + period + anim`  
 混合モデル : `my ~ treat + period + (1|anim)`

ケース 2

母数モデル : `my ~ exp + treat + exp:period + exp:anim`  
 混合モデル : `my ~ exp + treat + exp:period + (1|exp:anim)`

ケース 3

母数モデル : `my ~ exp + treat + period + anim3`  
 混合モデル : `my ~ exp + treat + period + (1|anim3)`

ケース 4

交互作用なし  
 母数モデル : `my ~ treat + period2 + anim`  
 混合モデル : `my ~ treat + period2 + (1|anim)`

交互作用あり

母数モデル : `my ~ treat * period2 + anim`  
 混合モデル : `my ~ treat * period2 + (1|anim)`

なお、分析用データセットについては、ケース 1 の場合は、飼料 (`treat ∈ {T1, T2, T3}`)、期間 (`period ∈ {P1, P2, P3}`)、個体 (`anim ∈ {A1, A2, A3}`) および乳量 (`my` : 連続変数) とした。また、ケース 2 ~ ケース 4 のための分析用データセットでは、実験 (`exp ∈ {E1, E2}`)、飼料 (`treat ∈ {T1, T2, T3}`)、期間 (`period ∈ {P1, P2, P3, P4, P5, P6}`)、個体 (`anim ∈ {A1, A2, A3, A4, A5, A6}`)、反復した個体 (ケース 3 で用いる: `anim3 ∈ {A1, A2, A3}`)、反復した期間 (ケース 4 で用いる: `period2 ∈ {P1, P2, P3}`) および乳量 (`my` : 連続変数) とした。

ケース 2 の出力例 (主要な部分のみ) を示す。

母数モデル :

分散分析表

Analysis of Variance Table

Response: my

|            | Df | Sum Sq | Mean Sq      | F value       | Pr(>F)            |
|------------|----|--------|--------------|---------------|-------------------|
| exp        | 1  | 32.267 | 32.267       | 17.5524       | 0.005752 **       |
| treat      | 2  | 24.368 | 12.184       | <b>6.6277</b> | <b>0.020255 *</b> |
| exp:period | 4  | 6.522  | 1.631        | 0.8870        | 0.524799          |
| exp:anim   | 4  | 15.116 | 3.779        | 2.0556        | 0.205302          |
| Residuals  | 6  | 11.030 | <b>1.838</b> |               |                   |

表 3 の F 値に対応

表 3 の  $\sigma^2$  に対応

Signif. codes: 0 '\*\*\*' 0.001 '\*\*' 0.01 '\*' 0.05 '.' 0.1 ' ' 1

>

最小 2 乗平均値

> lsmeans(full.ref, "treat")

| treat | lsmean       | SE           | df | lower.CL | upper.CL |
|-------|--------------|--------------|----|----------|----------|
| T1    | <b>8.53</b>  | <b>0.554</b> | 6  | 7.18     | 9.89     |
| T2    | <b>9.68</b>  | <b>0.554</b> | 6  | 8.33     | 11.04    |
| T3    | <b>11.37</b> | <b>0.554</b> | 6  | 10.01    | 12.72    |

lsmean : 最小 2 乗平均値  
 表 3 の A1, A2, A3 に対応  
 SE : 表 3 の SEM に対応  
 lower.CL, upper.CL : 最小 2 乗平均値の 95% 信頼区間の下限値と上限値

Results are averaged over the levels of: anim, period, exp  
 Confidence level used: 0.95

混合モデル :

Random effects:

| Groups   | Name        | Variance      | Std. Dev. |
|----------|-------------|---------------|-----------|
| exp:anim | (Intercept) | <b>0.6469</b> | 0.8043    |
|          | Residual    | <b>1.8383</b> | 1.3559    |

Number of obs: 18, groups: exp:anim, 6

Variance : 変量効果の分散の値

Residual が表 3 の  $\sigma_e^2$  に対応

exp:anim が表 3 の  $\sigma_a^2$  に対応

分散分析表 (母数効果のみ)

Analysis of Variance Table

|            | Df | Sum Sq  | Mean Sq | F value       |
|------------|----|---------|---------|---------------|
| exp        | 1  | 15.6972 | 15.6972 | 8.5388        |
| treat      | 2  | 24.3678 | 12.1839 | <b>6.6277</b> |
| exp:period | 4  | 6.5222  | 1.6306  | 0.8870        |

表 3 の F 値に対応

最小 2 乗平均値

| treat | lsmean       | SE           | df   | lower. CL | upper. CL |
|-------|--------------|--------------|------|-----------|-----------|
| T1    | <b>8.53</b>  | <b>0.644</b> | 9.55 | 7.09      | 9.98      |
| T2    | <b>9.68</b>  | <b>0.644</b> | 9.55 | 8.24      | 11.13     |
| T3    | <b>11.37</b> | <b>0.644</b> | 9.55 | 9.92      | 12.81     |

出力項目は上記の母数効果  
モデルの場合と同じ

Results are averaged over the levels of: period, exp

Degrees-of-freedom method: kenward-roger

Confidence level used: 0.95
